# Supplementary material for: Safety and efficacy of lumen-apposing metal stents versus plastic stents to treat walled-off pancreatic necrosis: systematic review and meta-analysis
Source: PubMed Central journal article supplement — Endosc Int Open. 2020 Oct 22;8(11):E1639–53. doi: 10.1055/a-1243-0092 (PMC7584468; doi:10.1055/a-1243-0092), 2020-10-22
Supplement: 1955supmat_10-1055-a-1243-0092.pdf [file 1955supmat_10-1055-a-1243-0092.pdf]

## Supplementary material

### Supplementary Table 1 Search strategy.

Ovid

Database(s): Embase 1988 to 2019 Week 41, EBM Reviews - Cochrane Central Register of Controlled Trials October 2019, EBM Reviews - Cochrane Database of Systematic Reviews 2005 to October 09, 2019, Ovid MEDLINE(R) and Epub Ahead of Print, In-Process & Other Non-Indexed Citations, and Daily 1946 to October 09, 2019

Search Strategy:

| #  | Searches                                                                                                                                                                                                                                                                                                                                                                                                                                                                                                                                                                                                                                                                                                                                                                                                                                                                                                                                                                                                                                                                                                                                                                                                                                                                                                                                                                                                                                                                                                                                                                                                                                                                                                                                                                                                    |
|----|-------------------------------------------------------------------------------------------------------------------------------------------------------------------------------------------------------------------------------------------------------------------------------------------------------------------------------------------------------------------------------------------------------------------------------------------------------------------------------------------------------------------------------------------------------------------------------------------------------------------------------------------------------------------------------------------------------------------------------------------------------------------------------------------------------------------------------------------------------------------------------------------------------------------------------------------------------------------------------------------------------------------------------------------------------------------------------------------------------------------------------------------------------------------------------------------------------------------------------------------------------------------------------------------------------------------------------------------------------------------------------------------------------------------------------------------------------------------------------------------------------------------------------------------------------------------------------------------------------------------------------------------------------------------------------------------------------------------------------------------------------------------------------------------------------------|
| 1  | exp Necrosis/                                                                                                                                                                                                                                                                                                                                                                                                                                                                                                                                                                                                                                                                                                                                                                                                                                                                                                                                                                                                                                                                                                                                                                                                                                                                                                                                                                                                                                                                                                                                                                                                                                                                                                                                                                                               |
| 2  | exp Pancreas/ or exp Pancreatitis/                                                                                                                                                                                                                                                                                                                                                                                                                                                                                                                                                                                                                                                                                                                                                                                                                                                                                                                                                                                                                                                                                                                                                                                                                                                                                                                                                                                                                                                                                                                                                                                                                                                                                                                                                                          |
| 3  | 1 and 2                                                                                                                                                                                                                                                                                                                                                                                                                                                                                                                                                                                                                                                                                                                                                                                                                                                                                                                                                                                                                                                                                                                                                                                                                                                                                                                                                                                                                                                                                                                                                                                                                                                                                                                                                                                                     |
| 4  | ((pancrea* adj3 (necros* or necroti*)) or (pancrea* adj3 fluid* adj3 collection*) or "walled-off necros*" or "walled-off necroti*").mp.                                                                                                                                                                                                                                                                                                                                                                                                                                                                                                                                                                                                                                                                                                                                                                                                                                                                                                                                                                                                                                                                                                                                                                                                                                                                                                                                                                                                                                                                                                                                                                                                                                                                     |
| 5  | 3 or 4                                                                                                                                                                                                                                                                                                                                                                                                                                                                                                                                                                                                                                                                                                                                                                                                                                                                                                                                                                                                                                                                                                                                                                                                                                                                                                                                                                                                                                                                                                                                                                                                                                                                                                                                                                                                      |
| 6  | ((endoscop* or transmural*) adj3 drain*) or ((metal* or plastic*) adj3 stent*) or "AXIOS stent*" or "double pigtail plastic stent*" or "endoscopic necrosectom*" or "lumen apposing metal stent*" or "metal stent*" or "plastic stent*" or "self-expanding metal stent*").mp.                                                                                                                                                                                                                                                                                                                                                                                                                                                                                                                                                                                                                                                                                                                                                                                                                                                                                                                                                                                                                                                                                                                                                                                                                                                                                                                                                                                                                                                                                                                               |
| 7  | 5 and 6                                                                                                                                                                                                                                                                                                                                                                                                                                                                                                                                                                                                                                                                                                                                                                                                                                                                                                                                                                                                                                                                                                                                                                                                                                                                                                                                                                                                                                                                                                                                                                                                                                                                                                                                                                                                     |
| 8  | limit 7 to english language [Limit not valid in CDSR; records were retained]                                                                                                                                                                                                                                                                                                                                                                                                                                                                                                                                                                                                                                                                                                                                                                                                                                                                                                                                                                                                                                                                                                                                                                                                                                                                                                                                                                                                                                                                                                                                                                                                                                                                                                                                |
| 9  | limit 8 to yr="1990 -Current"                                                                                                                                                                                                                                                                                                                                                                                                                                                                                                                                                                                                                                                                                                                                                                                                                                                                                                                                                                                                                                                                                                                                                                                                                                                                                                                                                                                                                                                                                                                                                                                                                                                                                                                                                                               |
| 10 | 9 not "conference abstract".pt.                                                                                                                                                                                                                                                                                                                                                                                                                                                                                                                                                                                                                                                                                                                                                                                                                                                                                                                                                                                                                                                                                                                                                                                                                                                                                                                                                                                                                                                                                                                                                                                                                                                                                                                                                                             |
| 11 | (exp animals/ or exp nonhuman/) not exp humans/                                                                                                                                                                                                                                                                                                                                                                                                                                                                                                                                                                                                                                                                                                                                                                                                                                                                                                                                                                                                                                                                                                                                                                                                                                                                                                                                                                                                                                                                                                                                                                                                                                                                                                                                                             |
| 12 | ((alpaca or alpacas or amphibian or amphibians or animal or animals or antelope or armadillo or armadillos or avian or baboon or baboons or beagle or beagles or bee or bees or bird or birds or bison or bovine or buffalo or buffaloes or buffalos or "c elegans" or "Caenorhabditis elegans" or camel or camels or canine or canines or carp or cats or cattle or chick or chicken or chickens or chicks or chimp or chimpanze or chimpanzees or chimps or cow or cows or "D melanogaster" or "dairy calf" or "dairy calves" or deer or dog or dogs or donkey or donkeys or drosophila or "Drosophila melanogaster" or duck or duckling or ducklings or ducks or equid or equids or equine or equines or feline or felines or ferret or ferrets or finch or finches or fish or flatworm or flatworms or fox or foxes or frog or frogs or "fruit flies" or "fruit fly" or "G mellonella" or "Galleria mellonella" or geese or gerbil or gerbils or goat or goats or goose or gorilla or gorillas or hamster or hamsters or hare or hares or heifer or heifers or horse or horses or insect or insects or jellyfish or kangaroo or kangaroos or kitten or kittens or lagomorph or lagomorphs or lamb or lambs or llama or llamas or macaque or macaques or macaw or macaws or marmoset or marmosets or mice or minipig or minipigs or mink or minks or monkey or monkeys or mouse or mule or mules or nematode or nematodes or octopus or octopuses or orangutan or "orang-utan" or orangutans or "orang-utans" or oxen or parrot or parrots or pig or pigeon or pigeons or piglet or piglets or pigs or porcine or primate or primates or quail or rabbit or rabbits or rat or rats or reptile or reptiles or rodent or rodents or ruminant or ruminants or salmon or sheep or shrimp or slug or slugs or |

## Supplementary material

|    |                                                                                                                                                                                                                                                                                                                                                                                                                                                                                                                                                                          |
|----|--------------------------------------------------------------------------------------------------------------------------------------------------------------------------------------------------------------------------------------------------------------------------------------------------------------------------------------------------------------------------------------------------------------------------------------------------------------------------------------------------------------------------------------------------------------------------|
|    | swine or tamarin or tamarins or toad or toads or trout or urchin or urchins or vole or voles or waxworm or waxworms or worm or worms or xenopus or "zebra fish" or zebrafish) not (human or humans)).mp.                                                                                                                                                                                                                                                                                                                                                                 |
| 13 | 10 not (11 or 12)                                                                                                                                                                                                                                                                                                                                                                                                                                                                                                                                                        |
| 14 | limit 13 to (editorial or erratum or letter or note or addresses or autobiography or bibliography or biography or blogs or comment or dictionary or directory or interactive tutorial or interview or lectures or legal cases or legislation or news or newspaper article or overall or patient education handout or periodical index or portraits or published erratum or video-audio media or webcasts) [Limit not valid in Embase,CCTR,CDSR,Ovid MEDLINE(R),Ovid MEDLINE(R) Daily Update,Ovid MEDLINE(R) In-Process,Ovid MEDLINE(R) Publisher; records were retained] |
| 15 | from 14 keep 1-93                                                                                                                                                                                                                                                                                                                                                                                                                                                                                                                                                        |
| 16 | 13 not 15                                                                                                                                                                                                                                                                                                                                                                                                                                                                                                                                                                |
| 17 | remove duplicates from 16                                                                                                                                                                                                                                                                                                                                                                                                                                                                                                                                                |

### Scopus

|   |                                                                                                                                                                                                                                                                                                                                                                                                                                                                                                                                                                                                                                                                                                                                                                                                                                                                                                                                                                                                                                                                                                                                                                                                                                                                                                                                                                                                                                                                                                                                                                                                                                                                                                                                                                                                                                                                                             |
|---|---------------------------------------------------------------------------------------------------------------------------------------------------------------------------------------------------------------------------------------------------------------------------------------------------------------------------------------------------------------------------------------------------------------------------------------------------------------------------------------------------------------------------------------------------------------------------------------------------------------------------------------------------------------------------------------------------------------------------------------------------------------------------------------------------------------------------------------------------------------------------------------------------------------------------------------------------------------------------------------------------------------------------------------------------------------------------------------------------------------------------------------------------------------------------------------------------------------------------------------------------------------------------------------------------------------------------------------------------------------------------------------------------------------------------------------------------------------------------------------------------------------------------------------------------------------------------------------------------------------------------------------------------------------------------------------------------------------------------------------------------------------------------------------------------------------------------------------------------------------------------------------------|
| 1 | TITLE-ABS-KEY(((pancrea* W/3 (necros* or necroti*)) OR (pancrea* W/3 fluid* W/3 collection*) OR "walled-off necros*" OR "walled-off necroti*"))                                                                                                                                                                                                                                                                                                                                                                                                                                                                                                                                                                                                                                                                                                                                                                                                                                                                                                                                                                                                                                                                                                                                                                                                                                                                                                                                                                                                                                                                                                                                                                                                                                                                                                                                             |
| 2 | TITLE-ABS-KEY(((endoscop* or transmural*) W/3 drain*) OR ((metal* or plastic*) W/3 stent*) OR "AXIOS stent*" OR "double pigtail plastic stent*" OR "endoscopic necrosectom*" OR "lumen apposing metal stent*" OR "metal stent*" OR "plastic stent*" OR "self-expanding metal stent*"))                                                                                                                                                                                                                                                                                                                                                                                                                                                                                                                                                                                                                                                                                                                                                                                                                                                                                                                                                                                                                                                                                                                                                                                                                                                                                                                                                                                                                                                                                                                                                                                                      |
| 3 | PUBYEAR AFT 1989 AND LANGUAGE(english)                                                                                                                                                                                                                                                                                                                                                                                                                                                                                                                                                                                                                                                                                                                                                                                                                                                                                                                                                                                                                                                                                                                                                                                                                                                                                                                                                                                                                                                                                                                                                                                                                                                                                                                                                                                                                                                      |
| 4 | 1 and 2 and 3                                                                                                                                                                                                                                                                                                                                                                                                                                                                                                                                                                                                                                                                                                                                                                                                                                                                                                                                                                                                                                                                                                                                                                                                                                                                                                                                                                                                                                                                                                                                                                                                                                                                                                                                                                                                                                                                               |
| 5 | TITLE-ABS-KEY((alpaca OR alpacas OR amphibian OR amphibians OR animal OR animals OR antelope OR armadillo OR armadillos OR avian OR baboon OR baboons OR beagle OR beagles OR bee OR bees OR bird OR birds OR bison OR bovine OR buffalo OR buffaloes OR buffalos OR "c elegans" OR "Caenorhabditis elegans" OR camel OR camels OR canine OR canines OR carp OR cats OR cattle OR chick OR chicken OR chickens OR chicks ORchimp OR chimpanze OR chimpanzees OR chimps OR cow OR cows OR "D melanogaster" OR "dairy calf" OR "dairy calves" OR deer OR dog OR dogs OR donkey OR donkeys OR drosophila OR "Drosophila melanogaster" OR duck OR duckling OR ducklings OR ducks OR equid OR equids OR equine OR equines OR feline OR felines OR ferret OR ferrets OR finch OR finches OR fish OR flatworm OR flatworms OR fox OR foxes OR frog OR frogs OR "fruit flies" OR "fruit fly" OR "G mellonella" OR "Galleria mellonella" OR geese OR gerbil OR gerbils OR goat OR goats OR goose OR gorilla OR gorillas OR hamster OR hamsters OR hare OR hares OR heifer OR heifers OR horse OR horses OR insect OR insects OR jellyfish OR kangaroo OR kangaroos OR kitten OR kittens OR lagomorph OR lagomorphs OR lamb OR lambs OR llama OR llamas OR macaque OR macaques OR macaw OR macaws OR marmoset OR marmosets OR mice OR minipig OR minipigs OR mink OR minks OR monkey OR monkeys OR mouse OR mule OR mules OR nematode OR nematodes OR octopus OR octopuses OR orangutan OR "orang-utan" OR orangutans OR "orang-utans" OR oxen OR parrot OR parrots OR pig OR pigeon OR pigeons OR piglet OR piglets OR pigs OR porcine OR primate OR primates OR quail OR rabbit OR rabbits OR rat OR rats OR reptile OR reptiles OR rodent OR rodents OR ruminant OR ruminants OR salmon OR sheep OR shrimp OR slug OR slugs OR swine OR tamarin OR tamarins OR toad OR toads OR trout OR urchin OR |

## Supplementary material

|    |                                                                                                                                      |
|----|--------------------------------------------------------------------------------------------------------------------------------------|
|    | urchins OR vole OR voles OR waxworm OR waxworms OR worm OR worms OR xenopus OR "zebra fish" OR zebrafish) AND NOT (human OR humans)) |
| 6  | 4 and not 5                                                                                                                          |
| 7  | DOCTYPE(le) OR DOCTYPE(ed) OR DOCTYPE(bk) OR DOCTYPE(er) OR DOCTYPE(no) OR DOCTYPE(sh) OR DOCTYPE(ab)                                |
| 8  | 6 and not 7                                                                                                                          |
| 9  | PMID(0*) OR PMID(1*) OR PMID(2*) OR PMID(3*) OR PMID(4*) OR PMID(5*) OR PMID(6*) OR PMID(7*) OR PMID(8*) OR PMID(9*)                 |
| 10 | 8 and not 9                                                                                                                          |

## Supplementary material

**Supplementary Table 2** Assessment of methodologic quality of studies utilizing a modified Newcastle-Ottawa Scale.

| Study                  | Year | Question 1 |      | Question 2 |    | Question 3 |    | Question 4 |    | Question 5 |    | Methodologic Quality |
|------------------------|------|------------|------|------------|----|------------|----|------------|----|------------|----|----------------------|
|                        |      | Yes        | No   | Yes        | No | Yes        | No | Yes        | No | Yes        | No |                      |
|                        |      | Kumar [1]  | 2014 | X          |    | X          |    | X          |    |            | X  |                      |
| Lin [2]                | 2014 | X          |      | X          |    | X          |    | X          |    | X          |    | Good                 |
| Rana [3]               | 2014 | X          |      | X          |    |            | X  |            | X  |            | X  | Poor                 |
| Rana [4]               | 2015 | X          |      |            | X  | X          |    |            | X  |            | X  | Poor                 |
| Rinninella [5]         | 2015 | X          |      | X          |    | X          |    | X          |    | X          |    | Good                 |
| Smoczynski [6]         | 2015 | X          |      |            | X  | X          |    | X          |    | X          |    | Moderate             |
| Walter [7]             | 2015 | X          |      | X          |    |            | X  | X          |    | X          |    | Moderate             |
| Sharaiha [8]           | 2016 | X          |      | X          |    | X          |    | X          |    | X          |    | Good                 |
| Siddiqui [9]           | 2016 | X          |      | X          |    | X          |    | X          |    | X          |    | Good                 |
| Storm [10]             | 2016 |            | X    | X          |    |            | X  | X          |    | X          |    | Poor                 |
| Thompson [11]          | 2016 | X          |      | X          |    | X          |    |            | X  | X          |    | Moderate             |
| Adler [12]             | 2017 |            | X    | X          |    | X          |    |            | X  |            | X  | Poor                 |
| Bang [13]              | 2017 | X          |      | X          |    | X          |    | X          |    | X          |    | Good                 |
| Bapaye [14]            | 2017 | X          |      | X          |    |            | X  | X          |    | X          |    | Moderate             |
| Bekkali [15]           | 2017 | X          |      |            | X  |            | X  | X          |    | X          |    | Poor                 |
| He [16]                | 2017 | X          |      | X          |    | X          |    | X          |    | X          |    | Good                 |
| Rana [17]              | 2017 | X          |      |            | X  |            | X  |            | X  |            | X  | Poor                 |
| Ren [18]               | 2017 | X          |      |            | X  | X          |    |            | X  |            | X  | Poor                 |
| Siddiqui [19]          | 2017 | X          |      | X          |    | X          |    | X          |    | X          |    | Good                 |
| Tarantino [20]         | 2017 | X          |      | X          |    | X          |    | X          |    | X          |    | Good                 |
| Watanabe [21]          | 2017 | X          |      | X          |    | X          |    | X          |    | X          |    | Good                 |
| Yoo [22]               | 2017 |            | X    | X          |    | X          |    | X          |    | X          |    | Moderate             |
| Abu Dayyeh [23]        | 2018 | X          |      | X          |    | X          |    | X          |    | X          |    | Good                 |
| Garcia-Alonso [24]     | 2018 | X          |      |            | X  | X          |    | X          |    | X          |    | Moderate             |
| Law [25]               | 2018 | X          |      | X          |    |            | X  | X          |    | X          |    | Moderate             |
| Shekhar [26]           | 2018 | X          |      | X          |    | X          |    | X          |    | X          |    | Good                 |
| Venkatachalapathy [27] | 2018 | X          |      | X          |    | X          |    | X          |    | X          |    | Good                 |
| Yang [28]              | 2018 | X          |      | X          |    | X          |    | X          |    | X          |    | Good                 |
| Bang [29]              | 2019 | X          |      | X          |    | X          |    | X          |    | X          |    | Good                 |

## Supplementary material

| Study | Year | Question 1 |      | Question 2 |    | Question 3 |    | Question 4 |    | Question 5 |    | Methodologic Quality |
|-------|------|------------|------|------------|----|------------|----|------------|----|------------|----|----------------------|
|       |      | Yes        | No   | Yes        | No | Yes        | No | Yes        | No | Yes        | No |                      |
|       |      | Chen [30]  | 2019 | X          |    | X          |    | X          |    | X          |    |                      |

### Questions:

1. Did the patient(s) represent the whole case(s) of the medical center? Cases included represented the general population of walled-off-necrosis.
2. Was the diagnosis correctly made? Based on the revised Atlanta criteria.
3. Was follow-up long enough for outcomes to occur? Reported adequate follow-up time.
4. Were all important data cited in the report? Reported resolution and at least 2 outcomes.
5. Was the outcome correctly ascertained? Provided definition of resolution.

## Supplementary material

**Supplementary Table 3** Status of studies included in Bazerbachi 2018 [31].

| Author (year)                            | Status         | Rationale                                                                               |
|------------------------------------------|----------------|-----------------------------------------------------------------------------------------|
| Abu Dayyeh (2018) [23]                   | Kept LAMS only | Mixed EUS for DPPS                                                                      |
| Lakhtakia (2017) [32]                    | Dropped        | No DPPS, LAMS were non-AXIOS                                                            |
| Ang (2016) [33]                          | Dropped        | Had DPPS, LAMS were non-AXIOS, no results given for endpoints of interest               |
| Sharaiha (2016) [8]                      | Kept           |                                                                                         |
| Siddiqui (2017) [19]                     | Kept           |                                                                                         |
| Siddiqui (2016) [9]                      | Kept           |                                                                                         |
| Smoczyński (2016) [34]                   | Dropped        | Duplicate data                                                                          |
| Storm (2016) [10]                        | Kept           |                                                                                         |
| Thompson (2016) [11]                     | Kept           |                                                                                         |
| Sharma (2016) [35]                       | Dropped        | Mixed EUS, no EUS-stratified results                                                    |
| Keane (2016) [36]                        | Dropped        | No results given for endpoints of interest                                              |
| Gornals (2016) [37]                      | Dropped        | Duplicate data                                                                          |
| Bang (J Pediatr Gastroenterol 2016) [38] | Dropped        | Duplicate data                                                                          |
| Bang (Dig Endosc 2017) [13]              | Kept LAMS only | Mixed EUS for DPPS                                                                      |
| Bang (Gut 2017) [39]                     | Dropped        | Interim data, replaced by Bang (2019)                                                   |
| Albers (2016) [40]                       | Dropped        | No DPPS, LAMS were non-AXIOS                                                            |
| Walter (2015) [7]                        | Kept           |                                                                                         |
| Smoczyński (2015) [6]                    | Kept           |                                                                                         |
| Smith (2015) [41]                        | Dropped        | No DPPS and no LAMS                                                                     |
| Rana (2014) [3]                          | Kept           |                                                                                         |
| Schmidt (2015) [42]                      | Dropped        | Mixed EUS, no EUS-stratified results                                                    |
| Rinninella (2015) [5]                    | Kept           |                                                                                         |
| Rana (2015) [4]                          | Kept           |                                                                                         |
| Mukai (Endosc Ultrasound 2015) [43]      | Dropped        | No DPPS, LAMS were non-AXIOS                                                            |
| Bapaye (2017) [14]                       | Kept           |                                                                                         |
| Nabi (2017) [44]                         | Dropped        | No DPPS, LAMS were non-AXIOS                                                            |
| Mukai (Endoscopy 2015) [45]              | Dropped        | Too few patients: 2 DPPS, 3 LAMS                                                        |
| Jagielski (2015) [46]                    | Dropped        | Duplicate data                                                                          |
| Hugget (2015) [47]                       | Dropped        | No DPPS, LAMS were non-AXIOS                                                            |
| Chandran (2015) [48]                     | Dropped        | No DPPS, LAMS were non-AXIOS                                                            |
| Smoczyński (2014) [49]                   | Dropped        | No EUS                                                                                  |
| Saxena (2014) [50]                       | Dropped        | No DPPS and no LAMS                                                                     |
| Mukai (GIE 2014)                         | Dropped        | Used multiple gateway technique for DPPS patients, cannot separate AXIOS from LAMS data |
| Lin (2014) [2]                           | Kept           |                                                                                         |
| Kumar (2014) [1]                         | Kept           |                                                                                         |
| Attam (2014) [51]                        | Dropped        | No DPPS, LAMS were non-AXIOS                                                            |
| Yamamoto (2013) [52]                     | Dropped        | No DPPS, LAMS were non-AXIOS                                                            |
| Varadarajulu (2011) [53]                 | Dropped        | Mixed EUS, no EUS-stratified results                                                    |
| Gardner (2011) [54]                      | Dropped        | Mixed EUS, no EUS-stratified results                                                    |
| Gardner (2009) [55]                      | Dropped        | Mixed EUS, no EUS-stratified results                                                    |
| Papachristou (2007) [56]                 | Dropped        | Mixed EUS, no EUS-stratified results                                                    |

## Supplementary material

Supplementary Table 4 Definitions of WON size across studies.

| Size of Long Axis | Maximal Dimension/Diameter/Size | Other                                                                      | Not Defined                                                           | Not Collected/Recorded |
|-------------------|---------------------------------|----------------------------------------------------------------------------|-----------------------------------------------------------------------|------------------------|
| Bang [13]         | Abu Dayyeh [23]                 | Bang [29] – Provided both transverse and anteroposterior axes measurements | Adler [12]                                                            | He [16]                |
| Siddiqui [19]     | Bapaye [14]                     | Law [25] - Diameter                                                        | Bekkali [15]                                                          | Rana [4]               |
| Siddiqui [9]      | Rinninella [5]                  | Ren [18] - Cyst size in 2 dimensions, e.g. 7 x 8 cm                        | Chen [30]                                                             | Storm [10]             |
| Watanabe [21]     | Venkatachalapathy [27]          | Sharaiha [8] - Diameter                                                    | Garcia-Alonso [24]<br>Kumar [1]                                       | Thompson [11]          |
| Yang [28]         |                                 | Tarantino [20] – Diameter                                                  | Lin [2]                                                               |                        |
| Yoo [22]          |                                 |                                                                            | Rana [3]<br>Rana [17]<br>Shekhar [26]<br>Smoczyński [6]<br>Walter [7] |                        |

WON, walled-off necrosis.

## Supplementary material

**Supplementary Table 5** Analysis of heterogeneity by outcome and stent type in all (comparative and non-comparative) studies.

| Stent   | Outcome         | # of Studies | # of Patients | I <sup>2</sup> (95% CI) |
|---------|-----------------|--------------|---------------|-------------------------|
| LAMS    | Bleeding        | 14           | 741           | 76.1 (60.0, 85.8)       |
| Plastic | Bleeding        | 10           | 381           | 71.8 (46.5, 85.2)       |
| LAMS    | Perforation     | 12           | 545           | 17.7 (0.0, 57.0)        |
| Plastic | Perforation     | 6            | 287           | 0.0 (0.0, 68.9)         |
| LAMS    | Stent Migration | 15           | 788           | 81.6 (70.7, 88.4)       |
| Plastic | Stent Migration | 5            | 318           | 68.3 (18.2, 87.7)       |
| LAMS    | Stent Occlusion | 13           | 730           | 86.6 (78.8, 91.5)       |
| Plastic | Stent Occlusion | 4            | 239           | 90.1 (77.6, 95.6)       |
| LAMS    | WON Resolution  | 16           | 827           | 66.5 (43.4, 80.2)       |
| Plastic | WON Resolution  | 15           | 614           | 82.8 (72.9, 89.1)       |

LAMS, lumen-apposing metal stents; WON, walled-off necrosis.



## Supplementary material

Supplementary Table 6 Definitions of bleeding across studies.

| Defined                                                                                                                                                                                      | Defined as Requiring Transfusion | Not Defined in Methods, but Bleeding Event(s) Described as Follows in the Results                                                                                                                                       | Not Defined    | Not Collected/Recorded |
|----------------------------------------------------------------------------------------------------------------------------------------------------------------------------------------------|----------------------------------|-------------------------------------------------------------------------------------------------------------------------------------------------------------------------------------------------------------------------|----------------|------------------------|
| Garcia-Alonso [24]<br>Any GI bleed presenting as hematemesis, melena, hematochezia, or rectal bleeding, with endoscopic or radiologic documentation of the fistula as the source of bleeding | Bapaye [14]                      | Abu Dayyeh [23]<br>-Bleeding requiring endoscopic intervention<br>-Bleeding requiring IR<br>-Bleeding requiring surgery                                                                                                 | Adler [12]     | Bang [13]              |
| He [16]<br>-GI Bleeding: 500 ml of blood/24 hours<br>-Intra-abdominal bleeding: requiring surgical, radiologic, or endoscopic intervention                                                   | Kumar [1]                        | Law [25] "significant"                                                                                                                                                                                                  | Bekkali [15]   | Rana [3]               |
| Rinninella [5] Any hemorrhagic event requiring endotherapy, radiologic interventions, blood product transfusion, or inpatient observation                                                    |                                  | Lin [2] "bleeding from puncture site"                                                                                                                                                                                   | Ren [18]       | Rana [17]              |
| Sharaiha [8] Graded according to American Society for GI Endoscopy lexicon severity grading system                                                                                           |                                  | Shekhar [26] Resolved, with or without intervention                                                                                                                                                                     | Smoczyński [6] | Rana [4]               |
| Thompson [11] Bleeding requiring subsequent endoscopic or radiologic procedures for hemostasis                                                                                               |                                  | Siddiqui [9] "self-limiting"                                                                                                                                                                                            | Storm [10]     |                        |
|                                                                                                                                                                                              |                                  | Siddiqui [19] "bleeding at stent site"                                                                                                                                                                                  | Tarantino [20] |                        |
|                                                                                                                                                                                              |                                  | Walter [7] "self-limited device-related bleeding"                                                                                                                                                                       | Yoo [22]       |                        |
|                                                                                                                                                                                              |                                  | Bang [29] Various descriptions<br>Venkatalapathy [27] – Bleeding requiring transfusion and embolization<br>Yang [28] – "self-limited bleeding," "bleeding from the initial LAMS insertion tract required embolization," |                |                        |

## Supplementary material

Supplementary Table 7 Definitions of perforation across studies.

| Pneumoperitoneum Perforation of<br>on Imaging<br>plus Peritoneal<br>Signs | WON Wall or<br>Capsule | Not Defined in Methods, but Described as<br>Follows in the Results                                                                                                                                                                                                                                                                                                                                                                                                                                                                                                                                                                                                                          | Not Defined                                                                                                     | Not Collected/ Recorded                                                                                                                         |
|---------------------------------------------------------------------------|------------------------|---------------------------------------------------------------------------------------------------------------------------------------------------------------------------------------------------------------------------------------------------------------------------------------------------------------------------------------------------------------------------------------------------------------------------------------------------------------------------------------------------------------------------------------------------------------------------------------------------------------------------------------------------------------------------------------------|-----------------------------------------------------------------------------------------------------------------|-------------------------------------------------------------------------------------------------------------------------------------------------|
| Rinninella [5]                                                            | Kumar [1]              | Abu Dayyeh [23] - Perforation requiring surgery;                                                                                                                                                                                                                                                                                                                                                                                                                                                                                                                                                                                                                                            | Bekkali [15]                                                                                                    | Bang [13]                                                                                                                                       |
|                                                                           | Thompson [11]          | Perforation managed non-surgically<br>Adler [12] - "perforation from the creation of<br>cystenterostomy"<br>Bang [29] – Perforation and peritoneal leakage<br>of pancreatic fluid collection contents<br>Gardner [55] - "luminal perforations"<br>Sharaiha [8] - Graded according to American<br>Society for GI Endoscopy lexicon severity<br>grading system<br>Siddiqui [19] - "The perforations were not a<br>result of the stent design but a result of<br>operator stent maldeployment"<br>Smoczyński [6] - "Perforation<br>of the GI tract occurred during<br>fistulotomy formation"<br>Watanabe [21] - events of<br>"pneumoperitoneum"<br>and "puncture into another organ" described | Chen [30]<br>Garcia-Alonso [24]<br>He [16]<br>Ren [18]<br>Tarantino [20]<br>Walter [7]<br>Yang [28]<br>Yoo [22] | Bapaye [14]<br>Law [25]<br>Lin [2]<br>Rana [3]<br>Rana [17]<br>Rana [4]<br>Shekhar [26]<br>Siddiqui [9]<br>Storm [10]<br>Venkatachalapathy [27] |

## Supplementary material

Supplementary Table 8 Definitions of stent migration across studies.

| Stent Migration Within or Outside of WON | Need to Retrieve Stent from Within WON or Enteral Lumen | Other Definitions                                                                                                                                                                                                                                                                                                                                                                                                      | Not Defined in Methods, but Described as Follows in the Results                                                                                                         | Not Defined                                                | Not Collected/Recorded                                 |
|------------------------------------------|---------------------------------------------------------|------------------------------------------------------------------------------------------------------------------------------------------------------------------------------------------------------------------------------------------------------------------------------------------------------------------------------------------------------------------------------------------------------------------------|-------------------------------------------------------------------------------------------------------------------------------------------------------------------------|------------------------------------------------------------|--------------------------------------------------------|
| Bang [13]                                | Rinninella [5]                                          | Bang [29] – Migration into the gastrointestinal tract                                                                                                                                                                                                                                                                                                                                                                  | Bapaye [14] - "outward migration"                                                                                                                                       | Adler [12]                                                 | Kumar [1]                                              |
| Law [25]                                 |                                                         | Bekkali [15] - Defined according to Lakhtakia et al.† [32]<br>Garcia-Alonso [24] - radiologic and/or endoscopic confirmation of spontaneous dislodgment of the LAMS, appearing after the deployment of the stent and unrelated to the index or further endoscopic procedures through the stent; further classified as symptomatic or asymptomatic, internal or external<br>Law [25] - Dislodgement during necrosectomy | He [16] - "stent migration during direct migration into fistula tract"; "spontaneous stent migration" during DEN<br>Sharaiha [8] - "All migrations occurred during DEN" | Chen [30]<br>Ren [18]                                      | Lin [2]<br>Rana [3]                                    |
|                                          |                                                         | Tarantino [20] - Interprocedural dislodgement of stent with worsening of clinical conditions<br>Venkatachalapathy [27] - Migration of stent without manipulation. Clinically significant or insignificant.<br>Yang [28] – Interval change in the position (inward towards the gastrointestinal lumen or                                                                                                                | Siddiqui [19] - "stent migration out of the WON cavity"<br>Yoo [22] - "spontaneous migration into the enteral lumen after resolution of WONS"                           | Siddiqui [9]<br>Smoczyński [6]<br>Storm [10]<br>Walter [7] | Rana [17]<br>Rana [4]<br>Shekhar [26]<br>Thompson [11] |

## Supplementary material

outward towards the PFC) of  
the LAMS

Watanabe [21]

<sup>1</sup>Clinically insignificant

– spontaneous external migration of stent after complete resolution of WON

Clinically significant

– internal migration – migration of the stent into the cavity, with or without persistent WON

– external migration – migration of the stent with persistent WON

WON, walled-off necrosis; LAMS, lumen-apposing metal stent; PFC, pancreatic fluid collection.

## Supplementary material

Supplementary Table 9 Definitions of WON resolution in included studies.

| Absent             | CRR + SR        | CRR            | SR                     | WON Size ≤ 2<br>CM + SR | WON Size ≤ 3<br>CM + SR | RI + SR     |
|--------------------|-----------------|----------------|------------------------|-------------------------|-------------------------|-------------|
| Adler [12]         | Abu Dayyeh [23] | He [16]        | Kumar [1]              | Bang [13]               | Chen [30]               | Bapaye [14] |
| Garcia-Alonso [24] | Bang [29]       | Rinninella [5] | Storm [10]             | Law [25]                | Smoczynski [6]          |             |
| Rana [3]           | Bekkali [15]    | Sharaiha [8]   | Venkatachalapathy [27] | Lin [2]                 | Yang [28]               |             |
| Rana [4]           | Shekhar [26]    |                |                        | Walter [7]              |                         |             |
| Rana [17]          | Siddiqui [19]   |                |                        | Watanabe [21]           |                         |             |
| Ren [18]           | Siddiqui [9]    |                |                        |                         |                         |             |
|                    | Tarantino [20]  |                |                        |                         |                         |             |
|                    | Thompson [11]   |                |                        |                         |                         |             |
|                    | Yoo [22]        |                |                        |                         |                         |             |

CRR, complete radiologic resolution; SR, symptom resolution; RI, radiologic improvement; WON, walled-off necrosis.

## Supplementary material

**Supplementary Table 10** Summary of efficacy and safety meta-analytic outcomes for LAMS (all EUS-guided) vs. DPPS (with or without EUS guidance, including eight additional studies: Papachristou 2017 [56], Gardner 2009 [55], Gardner 2011 [54], Varadarajulu 2011 [53], Smoczynski 2014 [49], Schmidt 2015 [42], Sharma 2016 [35], Jagielski 2018 [57])

|                                               | LAMS<br>(EUS-guided only) |               |                            | DPPS<br>(with and without EUS<br>guidance) |               |                            | P<br>value |
|-----------------------------------------------|---------------------------|---------------|----------------------------|--------------------------------------------|---------------|----------------------------|------------|
|                                               | N<br>studies              | N<br>patients | % (95% CI)                 | N<br>studies                               | N<br>patients | % (95% CI)                 |            |
| <b>Safety Outcomes</b>                        |                           |               |                            |                                            |               |                            |            |
| Bleeding                                      | 14                        | 741           | 2.5%<br>(0.7%, 5.5%)       | 19                                         | 903           | 9.0%<br>(5.1%, 13.9%)      | 0.009      |
| Perforation                                   | 12                        | 545           | 0.5%<br>(0.0%, 1.3%)       | 13                                         | 735           | 2.6%<br>(1.3%, 4.4%)       | 0.005      |
| Stent migration                               | 15                        | 788           | 5.9%<br>(2.6%, 10.6%)      | 11                                         | 601           | 5.3%<br>(2.6%, 9.0%)       | 0.82       |
| Stent occlusion                               | 13                        | 730           | 3.8%<br>(0.9%, 8.7%)       | 6                                          | 310           | 7.0%<br>(1.1%, 17.4%)      | 0.47       |
| <b>Efficacy Outcomes</b>                      |                           |               |                            |                                            |               |                            |            |
| Resolution of WON                             | 16                        | 827           | 87.4%<br>(83.0%,<br>91.3%) | 25                                         | 1162          | 83.8%<br>(78.1%,<br>88.9%) | 0.30       |
| Number of procedures<br>to achieve resolution | 2                         | 115           | 2.09<br>(1.05, 3.13)       | 10                                         | 308           | 1.83<br>(1.54, 2.11)       | 0.64       |
| Total unique studies or<br>patients           | 17                        | 899           |                            | 26                                         | 1173          |                            |            |

LAMS, lumen-apposing metal stent; EUS, endoscopic ultrasound; DPPS, double-pigtail plastic stents; WON, wall-off necrosis.

## Supplementary material

**Supplementary Table 11** Publication bias testing.

| Outcome               | Rank correlation test of funnel plot asymmetry (Begg and Mazumdar) |      | Rank correlation test of funnel plot asymmetry (with continuity correction) (Begg and Mazumdar) |      | Linear regression test of funnel plot asymmetry (Eggers) |       |
|-----------------------|--------------------------------------------------------------------|------|-------------------------------------------------------------------------------------------------|------|----------------------------------------------------------|-------|
|                       | LAMS                                                               | DPPS | LAMS                                                                                            | DPPS | LAMS                                                     | DPPS  |
| Bleeding              | 0.74                                                               | 0.53 | 0.78                                                                                            | 0.59 | 0.63                                                     | 0.61  |
| Perforation           | 0.63                                                               | 0.57 | 0.68                                                                                            | 0.71 | 0.15                                                     | 0.94  |
| Occlusion             | 1.00                                                               | 0.33 | 1.00                                                                                            | 0.46 | 0.73                                                     | 0.24  |
| Migration             | 0.43                                                               | 0.17 | 0.46                                                                                            | 0.31 | 0.17                                                     | 0.059 |
| Resolution            | 0.39                                                               | 0.11 | 0.42                                                                                            | 0.12 | 0.23                                                     | 0.026 |
| Number of Procedures* | --                                                                 | 0.57 | --                                                                                              | 0.71 | --                                                       | 0.42  |

All numbers are *P* values from the rank correlation or linear regression tests for funnel plot symmetry.

\* - the test could not be conducted for the LAMS studies because only two studies were available.

LAMS, lumen-apposing metal stent; DPPS, double-pigtail plastic stent.

## Supplementary material

**Supplementary Fig. 1** Funnel plots for studies of LAMS compared to DPPS safety and efficacy outcomes. **a** Bleeding. **b** Perforation. **c** Stent migration. **d** stent occlusion; **e** Overall WON resolution. **f** number of endoscopic procedures to achieve resolution.

### A. Bleeding

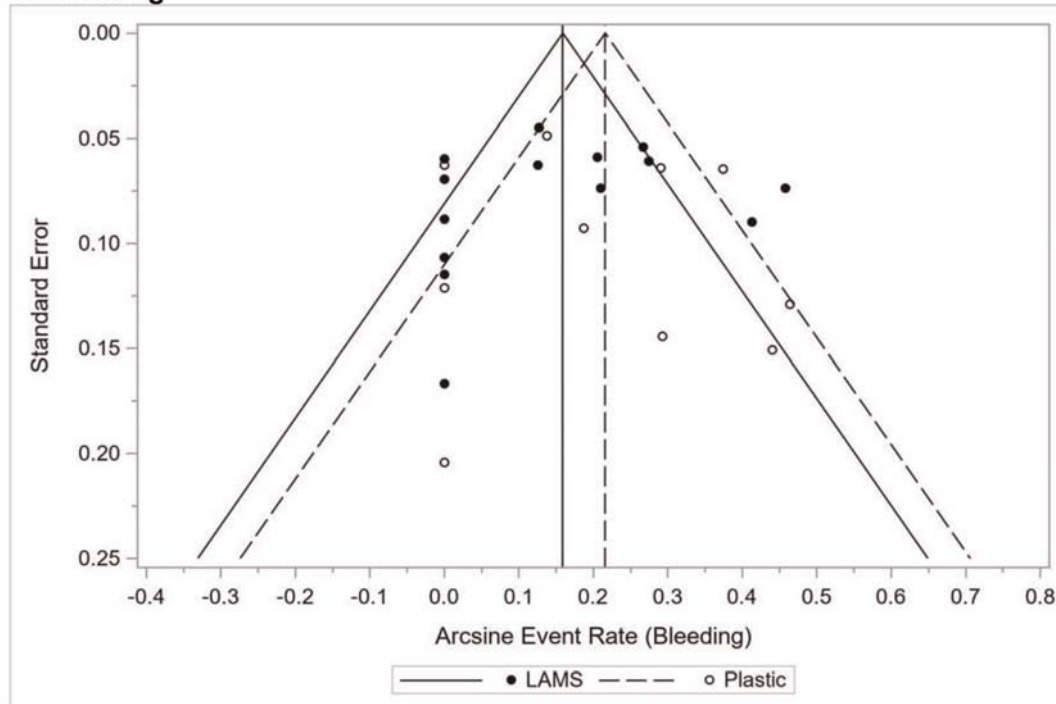



## Supplementary material

### B. Perforation

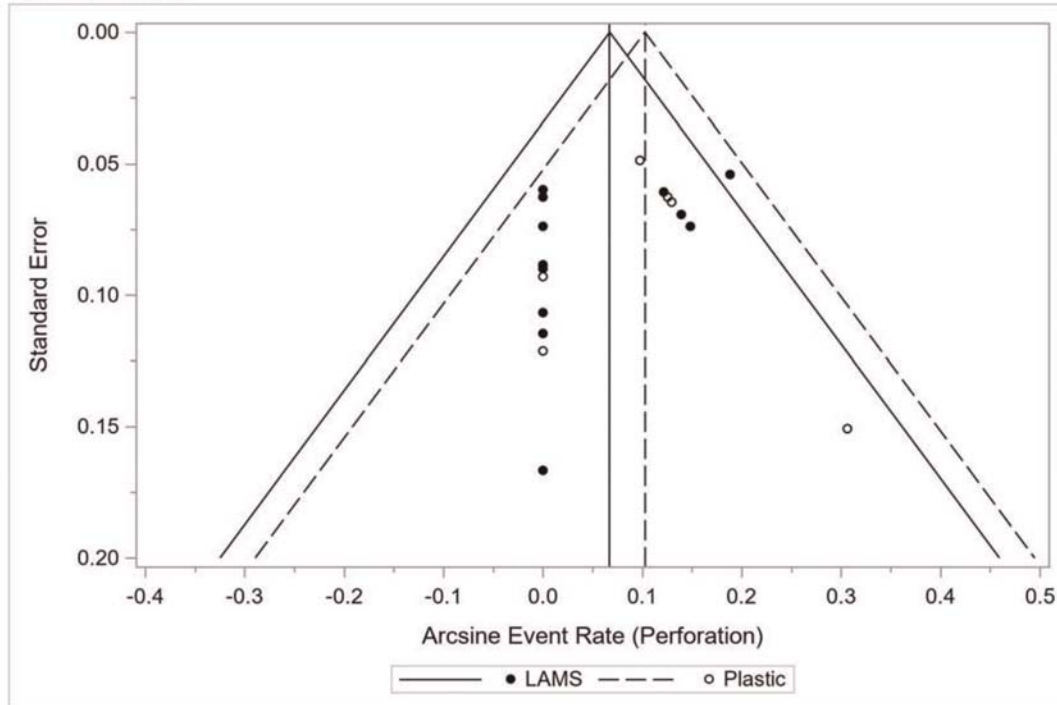

### C. Stent Migration

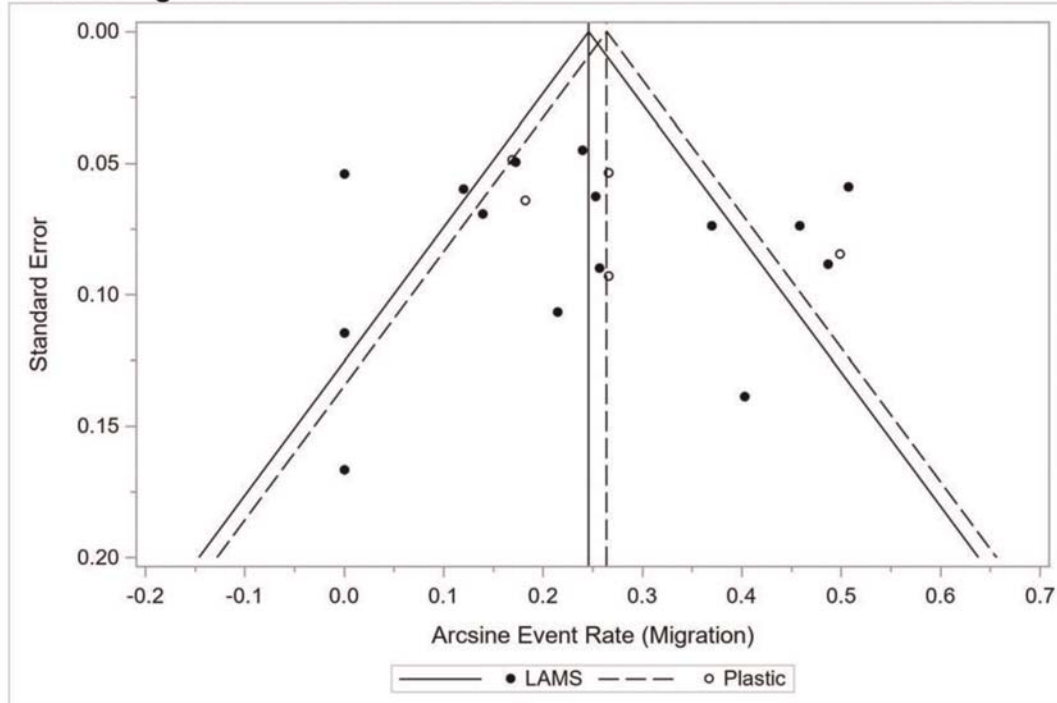

## Supplementary material

### D. Stent Occlusion

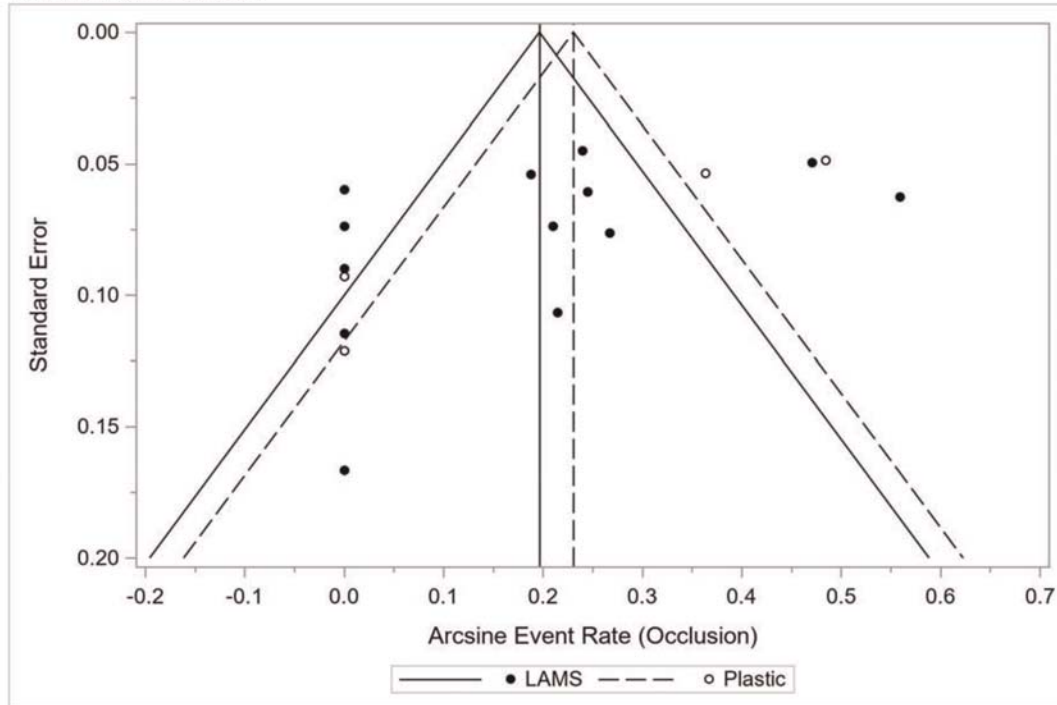

### E. WON Resolution

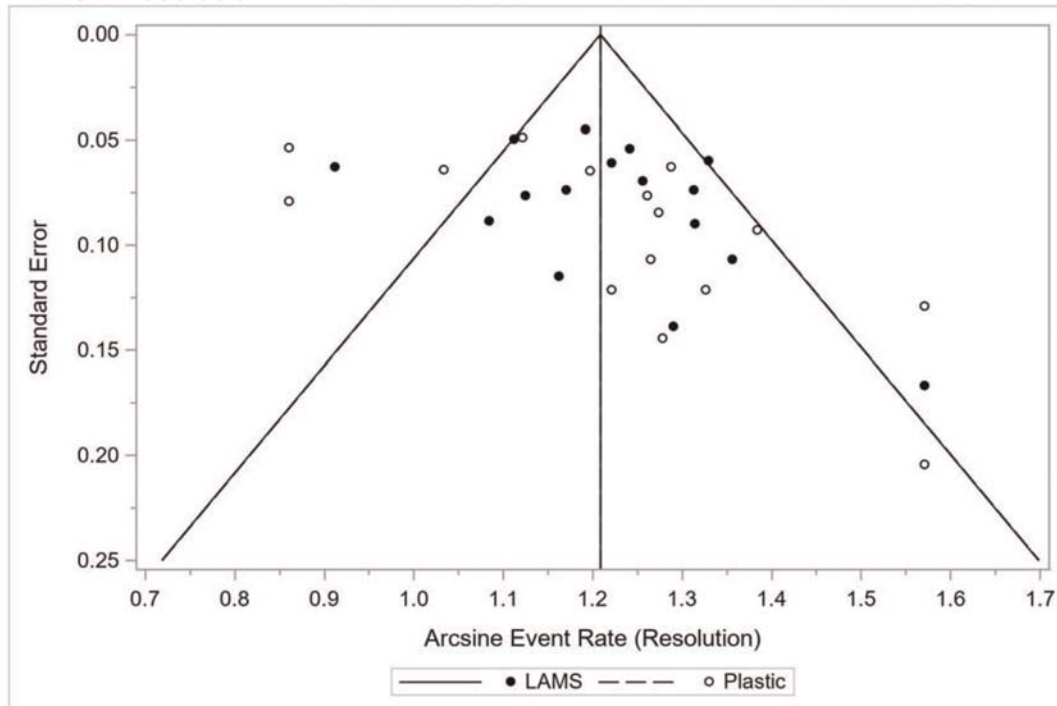

## Supplementary material

### F. Number of Endoscopic Procedures to Achieve Resolution

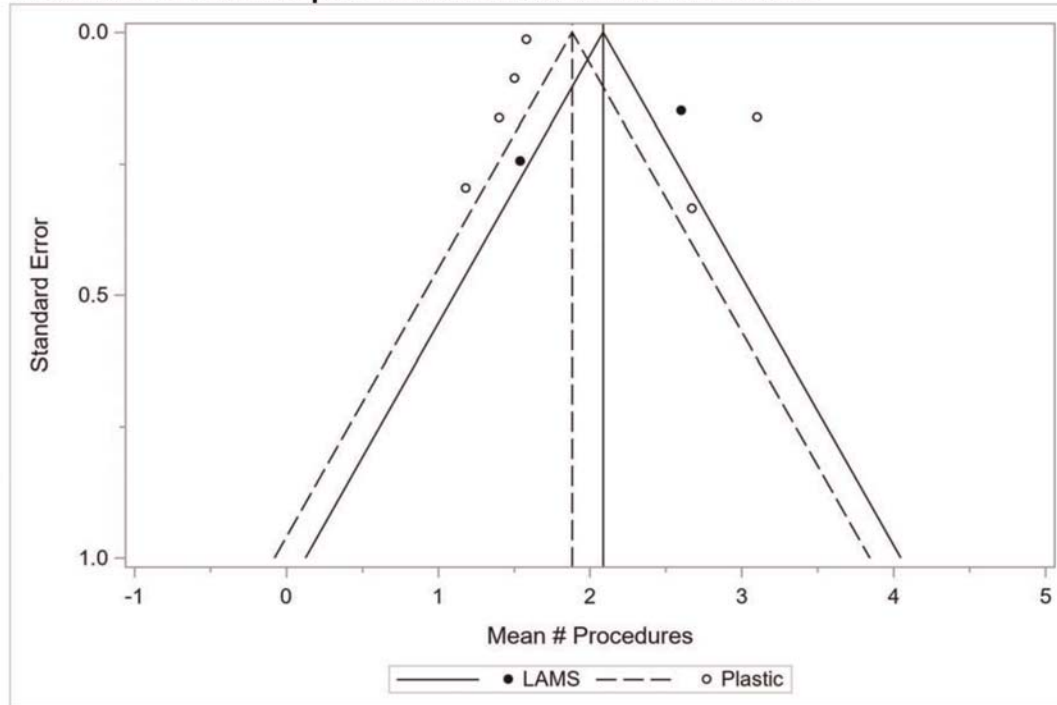

## Supplementary material

### Appendix References

- 1 Kumar N, Conwell DL, Thompson CC. Direct endoscopic necrosectomy versus step-up approach for walled-off pancreatic necrosis: comparison of clinical outcome and health care utilization. *Pancreas* 2014; 43: 1334-1339
- 2 Lin H, Zhan XB, Sun SY et al. Stent selection for endoscopic ultrasound-guided drainage of pancreatic fluid collections: a multicenter study in china. *Gastroenterol Res Pract* 2014; 2014: 193562
- 3 Rana SS, Bhasin DK, Sharma RK et al. Do the morphological features of walled off pancreatic necrosis on endoscopic ultrasound determine the outcome of endoscopic transmural drainage? *Endosc Ultrasound* 2014; 3: 118-122
- 4 Rana SS, Bhasin DK, Sharma R et al. Factors determining recurrence of fluid collections following migration of intended long term transmural stents in patients with walled off pancreatic necrosis and disconnected pancreatic duct syndrome. *Endosc Ultrasound* 2015; 4: 208-212
- 5 Rinninella E, Kunda R, Dollhopf M et al. EUS-guided drainage of pancreatic fluid collections using a novel lumen-apposing metal stent on an electrocautery-enhanced delivery system: a large retrospective study (with video). *Gastrointest Endosc* 2015; 82: 1039-1046
- 6 Smoczyński M, Jagielski M, Jabłońska A et al. Endoscopic necrosectomy under fluoroscopic guidance - a single center experience. *Wideochir Inne Tech Maloinwazyjne* 2015; 10: 237-243
- 7 Walter D, Will U, Sanchez-Yague A et al. A novel lumen-apposing metal stent for endoscopic ultrasound-guided drainage of pancreatic fluid collections: a prospective cohort study. *Endoscopy* 2015; 47: 63-67
- 8 Sharaiha RZ, Tyberg A, Khashab MA et al. Endoscopic therapy with lumen-apposing metal stents is safe and effective for patients with pancreatic walled-off necrosis. *Clin Gastroenterol Hepatol* 2016; 14: 1797-1803
- 9 Siddiqui AA, Adler DG, Nieto J et al. EUS-guided drainage of peripancreatic fluid collections and necrosis by using a novel lumen-apposing stent: a large retrospective, multicenter U.S. experience (with videos). *Gastrointest Endosc* 2016; 83: 699-707
10. Storm AC, Thompson CC. Safety of direct endoscopic necrosectomy in patients with gastric varices. *World J Gastrointest Endosc* 2016; 8: 402-408
- 11 Thompson CC, Kumar N, Slattery J et al. A standardized method for endoscopic necrosectomy improves complication and mortality rates. *Pancreatology* 2016; 16: 66-72
- 12 Adler DG, Taylor LJ, Hasan R et al. A retrospective study evaluating endoscopic ultrasound-guided drainage of pancreatic fluid collections using a novel lumen-apposing metal stent on an electrocautery enhanced delivery system. *Endosc Ultrasound* 2017; 6: 389-393
- 13 Bang JY, Hasan MK, Navaneethan U et al. Lumen-apposing metal stents for drainage of pancreatic fluid collections: When and for whom? *Dig Endosc* 2017; 29: 83-90
- 14 Bapaye A, Dubale NA, Sheth KA et al. Endoscopic ultrasonography-guided transmural drainage of walled-off pancreatic necrosis: Comparison between a

## Supplementary material

specially designed fully covered bi-flanged metal stent and multiple plastic stents.

Dig Endosc 2017; 29: 104-110

15 *Bekkali NLH, Nayar MK, Leeds JS et al.* A comparison of outcomes between a lumen-apposing metal stent with electrocautery-enhanced delivery system and a bi-flanged metal stent for drainage of walled-off pancreatic necrosis. *Endosc Int Open* 2017; 5: E1189-E1196

16 *He WH, Zhu Y, Liu P et al.* The outcomes of initial endoscopic transluminal drainage are superior to percutaneous drainage for patients with infected pancreatic necrosis: a prospective cohort study. *Surg Endosc* 2017; 31: 3004-3013

17 *Rana SS, Kumar A, Lal A et al.* Safety and efficacy of angioembolisation followed by endoscopic ultrasound guided transmural drainage for pancreatic fluid collections associated with arterial pseudoaneurysm. *Pancreatology* 2017; 17: 658-662

18 *Ren YC, Chen SM, Cai XB et al.* Endoscopic ultrasonography-guided drainage combined with trans-duodenoscope cyclic irrigation technique for walled-off pancreatic necrosis. *Dig Liver Dis* 2017; 49: 38-44

19 *Siddiqui AA, Kowalski TE, Loren DE et al.* Fully covered self-expanding metal stents versus lumen-apposing fully covered self-expanding metal stent versus plastic stents for endoscopic drainage of pancreatic walled-off necrosis: clinical outcomes and success. *Gastrointest Endosc* 2017; 85: 758-765

20 *Tarantino I, Ligresti D, Tuzzolino F et al.* Clinical impact of EUS treatment of walled-off pancreatic necrosis with dedicated devices. *Endosc Int Open* 2017; 5: E784-E791

21 *Watanabe Y, Mikata R, Yasui S et al.* Short- and long-term results of endoscopic ultrasound-guided transmural drainage for pancreatic pseudocysts and walled-off necrosis. *World J Gastroenterol* 2017; 23: 7110-7118

22 *Yoo J, Yan L, Hasan R et al.* Feasibility, safety, and outcomes of a single-step endoscopic ultrasonography-guided drainage of pancreatic fluid collections without fluoroscopy using a novel electrocautery-enhanced lumen-apposing, self-expanding metal stent. *Endosc Ultrasound* 2017; 6: 131-135

23 *Abu Dayyeh BK, Mukewar S, Majumder S et al.* Large-caliber metal stents versus plastic stents for the management of pancreatic walled-off necrosis. *Gastrointest Endosc* 2018; 87: 141-149

24 *Garcia-Alonso FJ, Sanchez-Ocana R, Penas-Herrero I et al.* Cumulative risks of stent migration and gastrointestinal bleeding in patients with lumen-apposing metal stents. *Endoscopy* 2018; 50: 386-395

25 *Law ST, De La SernaHiguera C, Simón PG et al.* Comparison of clinical efficacies and safeties of lumen-apposing metal stent and conventional-type metal stent-assisted EUS-guided pancreatic wall-off necrosis drainage: a real-life experience in a tertiary hospital. *Surg Endosc* 2018; 32: 2448-2453

26 *Shekhar C, Maher B, Forde C et al.* Endoscopic ultrasound-guided pancreatic fluid collections' transmural drainage outcomes in 100 consecutive cases of pseudocysts and walled off necrosis: a single-centre experience from the United Kingdom. *Scand J Gastroenterol* 2018; 53: 611-615

27 *Venkatachalapathy SV, Bekkali N, Pereira S et al.* Multicenter experience from the UK and Ireland of use of lumen-apposing metal stent for transluminal drainage of pancreatic fluid collections. *Endosc Int Open* 2018; 6: E259-E265

## Supplementary material

- 28 Yang D, Perbtani YB, Mramba LK et al. Safety and rate of delayed adverse events with lumen-apposing metal stents (LAMS) for pancreatic fluid collections: a multicenter study. *Endoscopy International Open* 2018; 6: E1267-E1275
- 29 Bang JY, Navaneethan U, Hasan MK et al. Non-superiority of lumen-apposing metal stents over plastic stents for drainage of walled-off necrosis in a randomised trial. *Gut* 2019; 68: 1200-1209
- 30 Chen Y-I, Yang J, Friedland S et al. Lumen apposing metal stents are superior to plastic stents in pancreatic walled-off necrosis: a large international multicenter study. *Endosc Int Open* 2019; 7: E347-E354
- 31 Bazerbachi F, Sawas T, Vargas EJ et al. Metal stents versus plastic stents for the management of pancreatic walled-off necrosis: a systematic review and meta-analysis. *Gastrointest Endosc* 2018; 87: 30-42.e15
- 32 Lakhtakia S, Basha J, Talukdar R et al. Endoscopic "step-up approach" using a dedicated biflanged metal stent reduces the need for direct necrosectomy in walled-off necrosis (with videos). *Gastrointest Endosc* 2017; 85: 1243-1252
- 33 Ang TL, Kongkam P, Kwek AB et al. A two-center comparative study of plastic and lumen-apposing large diameter self-expandable metallic stents in endoscopic ultrasound-guided drainage of pancreatic fluid collections. *Endosc Ultrasound* 2016; 5: 320-327
- 34 Smoczynski M, Jagielski M, Jablonska A et al. Transpapillary drainage of walled-off pancreatic necrosis - a single center experience. *Wideochir Inne Tech Maloinwazyjne* 2016; 10: 527-533
- 35 Sharma SS, Singh B, Jain M et al. Endoscopic management of pancreatic pseudocysts and walled-off pancreatic necrosis: A two-decade experience. *Indian J Gastroenterol* 2016; 35: 40-47
- 36 Keane MG, Sze SF, Cieplik N et al. Endoscopic versus percutaneous drainage of symptomatic pancreatic fluid collections: a 14-year experience from a tertiary hepatobiliary centre. *Surg Endosc* 2016; 30: 3730-3740
- 37 Gornals JB, Consiglieri CF, Busquets J et al. Endoscopic necrosectomy of walled-off pancreatic necrosis using a lumen-apposing metal stent and irrigation technique. *Surg Endosc* 2016; 30: 2592-2602
- 38 Bang JY, Varadarajulu S. Endoscopic treatment of walled-off necrosis in children: clinical experience and treatment outcomes. *J Pediatr Gastroenterol Nutr* 2016; 63: e31-35
- 39 Bang JY, Hasan M, Navaneethan U et al. Lumen-apposing metal stents (LAMS) for pancreatic fluid collection (PFC) drainage: may not be business as usual. *Gut* 2017; 66: 2054-2056
- 40 Albers D, Toermer T, Charton JP et al. Endoscopic therapy for infected pancreatic necrosis using fully covered self-expandable metal stents: combination of transluminal necrosectomy, transluminal and percutaneous drainage. *Z Gastroenterol* 2016; 54: 26-30
- 41 Smith IB, Gutierrez JP, Ramesh J et al. Endoscopic extra-cavitary drainage of pancreatic necrosis with fully covered self-expanding metal stents (fcSEMS) and staged lavage with a high-flow water jet system. *Endosc Int Open* 2015; 3: E154-160
- 42 Schmidt PN, Novovic S, Roug S et al. Endoscopic, transmural drainage and necrosectomy for walled-off pancreatic and peripancreatic necrosis is associated

## Supplementary material

- with low mortality--a single-center experience. *Scand J Gastroenterol* 2015; 50: 611-618
- 43 *Mukai S, Itoi T, Sofuni A et al.* Clinical evaluation of endoscopic ultrasonography-guided drainage using a novel flared-type biflanged metal stent for pancreatic fluid collection. *Endosc Ultrasound* 2015; 4: 120-125
- 44 *Nabi Z, Lakhtakia S, Basha J et al.* Endoscopic Ultrasound-guided Drainage of Walled-off Necrosis in Children With Fully Covered Self-expanding Metal Stents. *J Pediatr Gastroenterol Nutr* 2017; 64: 592-597
- 45 *Mukai S, Itoi T, Baron TH et al.* Endoscopic ultrasound-guided placement of plastic vs. biflanged metal stents for therapy of walled-off necrosis: a retrospective single-center series. *Endoscopy* 2015; 47: 47-55
- 46 *Jagielski M, Smoczynski M, Jablonska A et al.* The role of endoscopic ultrasonography in endoscopic debridement of walled-off pancreatic necrosis--A single center experience. *Pancreatology* 2015; 15: 503-507
- 47 *Huggett MT, Oppong KW, Pereira SP et al.* Endoscopic drainage of walled-off pancreatic necrosis using a novel self-expanding metal stent. *Endoscopy* 2015; 47: 929-932
- 48 *Chandran S, Efthymiou M, Kaffes A et al.* Management of pancreatic collections with a novel endoscopically placed fully covered self-expandable metal stent: a national experience (with videos). *Gastrointest Endosc* 2015; 81: 127-135
- 49 *Smoczynski M, Marek I, Dubowik M et al.* Endoscopic drainage/debridement of walled-off pancreatic necrosis--single center experience of 112 cases. *Pancreatology* 2014; 14: 137-142
50. *Saxena P, Singh VK, Messallam A et al.* Resolution of walled-off pancreatic necrosis by EUS-guided drainage when using a fully covered through-the-scope self-expandable metal stent in a single procedure (with video). *Gastrointest Endosc* 2014; 80: 319-324
- 51 *Attam R, Trikudanathan G, Arain M et al.* Endoscopic transluminal drainage and necrosectomy by using a novel, through-the-scope, fully covered, large-bore esophageal metal stent: preliminary experience in 10 patients. *Gastrointest Endosc* 2014; 80: 312-318
- 52 *Yamamoto N, Isayama H, Kawakami H et al.* Preliminary report on a new, fully covered, metal stent designed for the treatment of pancreatic fluid collections. *Gastrointest Endosc* 2013; 77: 809-814
- 53 *Varadarajulu S, Phadnis MA, Christein JD et al.* Multiple transluminal gateway technique for EUS-guided drainage of symptomatic walled-off pancreatic necrosis. *Gastrointest Endosc* 2011; 74: 74-80
- 54 *Gardner TB, Coelho-Prabhu N, Gordon SR et al.* Direct endoscopic necrosectomy for the treatment of walled-off pancreatic necrosis: results from a multicenter U.S. series. *Gastrointest Endosc* 2011; 73: 718-726
- 55 *Gardner TB, Chahal P, Papachristou GI et al.* A comparison of direct endoscopic necrosectomy with transmural endoscopic drainage for the treatment of walled-off pancreatic necrosis. *Gastrointest Endosc* 2009; 69: 1085-1094
- 56 *Papachristou GI, Takahashi N, Chahal P et al.* Peroral endoscopic drainage/debridement of walled-off pancreatic necrosis. *Ann Surg* 2007; 245: 943-951
- 57 *Jagielski M, Smoczynski M, Adrych K.* Single transluminal gateway transcystic multiple drainage for extensive walled-off pancreatic necrosis - a single-centre experience. *Prz* 2018; 13: 242-248
